# Supplementary material
Source: publisher figshare collection journal article supplement (https://gsapubs.figshare.com/articles/dataset/_/13623182)
Supplement: Supplementary file 1 [file 2]

Hildreth, W., Fierstein, J., and Ryan-Davis, J., 2020, No ring fracture in Mono Basin, California: GSA Bulletin, <https://doi.org/10.1130/B35747.1>.

## Supplemental Material

**Table S1.** Chemical data for the three plutons in the area investigated.
