# Supplementary material
Source: publisher figshare collection journal article supplement (https://gsapubs.figshare.com/articles/dataset/_/13623182)
Supplement: Supplementary file 1 [file 2]

## Sheet: Sheet1
Table S1. Granitic rocks associated with the shear zone
Sample	Pluton	Texture	Color Index	SiO2	TiO2	Al2O3	FeO*	MnO	MgO	CaO	Na2O	K2O	P2O5	Rb	Sr	Ba	Zr		Location
M-1248A	Kae	m-c eq	15–20	63.9571	0.709582	16.4762	4.34949	0.0704499	2.15752	4.17586	3.71199	3.77532	0.216433	121	574	1799	197		Rush Creek gorge, coarser
M-1248B	Kae	f-m eq	<10	64.8982	0.667164	16.5678	4.3788	0.0931857	1.63767	3.95716	3.92415	3.25781	0.218048	100	589	1367	157		Rush Creek gorge, finer
M-1257	Kae	m-c eq	15–20	66.9464	0.57054	15.2475	4.02922	0.0661733	1.70917	3.42774	3.53578	3.89074	0.176666	168	483	1001	142		Northwest Aeolian Buttes, summit
M-1258	Kae	m-c eq	10–15	67.8245	0.524874	15.195	3.53562	0.0537596	1.58468	3.32212	3.64519	3.75681	0.157483	160	483	982	130		South Aeolian Buttes at monument
M-1303	Kae	m-c sh eq	10–15	65.5534	0.601579	15.7132	4.51051	0.0717189	1.76688	3.70493	3.60763	3.87251	0.197662	144	520	998	145		Knoll 8240+, S end, W of Grant Lake
M-1304	Kae	m eq	10	65.7229	0.585231	16.9787	3.50236	0.0902248	1.21199	3.37851	4.50611	3.43203	0.191933	118	543	2089	198		Ridge 8841, E face 8400 ft
M-1305	Kae	f sh eq	5	65.4022	0.724545	16.1256	4.26456	0.110103	1.51394	3.508	4.12542	3.6298	0.195784	120	385	1229	215		Ridge 8841, E face 8280 ft
M-1308	Kae	m-c eq	10–15	66.433	0.559385	15.6299	3.83741	0.0701922	1.76649	3.63226	3.66055	3.84212	0.168666	138	518	985	130		Peninsula shoreline 7200 ft, Grant Lake
M-1334	Kae	c eq	20	65.0863	0.648677	16.2536	3.95902	0.0782041	1.80035	3.76282	3.88066	3.93861	0.19173	135	484	1362	209		Williams Butte, SW mass
M-1344	Kae	m-c eq	15–20	64.974	0.618665	15.9184	4.35107	0.0782324	2.06801	3.91718	3.80337	3.69039	0.180677	133	490	1187	203		Tailings block, Mono tunnel Shaft 1
M-1361B	Kae	m-c eq	15	68.0206	0.425859	16.6522	2.59	0.0693721	0.838429	2.68479	4.41334	3.81473	0.124514	118	502	2288	176		Ridge 8841, E-W rib S of S end
M-1381	Kae	m eq	20	63.5742	0.751815	16.7782	4.67071	0.200807	1.86353	4.44595	3.9127	3.20445	0.197607	97	432	1083	193		East of Parker Lake, SW window
M-1382	Kae	m-c eq	15–20	63.7614	0.761275	16.375	4.88343	0.313007	1.82971	3.95529	3.4399	4.07915	0.201864	118	410	1474	221		East of Parker Lake, NE window
M-1384	Kae?	m sh eq	20	67.6078	0.60716	15.5519	3.70727	0.0890044	1.13019	2.86422	4.02377	3.85738	0.161308	134	325	1142	198		Ridge 8841, N nose
M-1386	Kae?	f-m sh eq	10	68.8366	0.545608	15.151	3.15483	0.0871095	1.04667	2.7053	3.7792	4.14683	0.146886	159	308	1036	163		Ridge 8841, N nose
M-1414	Kae	c porph	15	66.686	0.542441	15.6748	3.77652	0.0680019	1.64107	3.64608	3.65552	3.74073	0.16885	129	523	966	132		Angular ejecta Mono Dome 27
M-1469	Kae	c eq	10–15	64.88	0.69	16.35	4.46	0.07	1.95	4.32	3.85	2.85	0.2	108	616	924	178		Williams Butte, SE mass
M-1472	Kae	m eq	15	66.41	0.66	16.54	3.53	0.12	1.11	3.12	4.33	3.59	0.18	114	404	1364	207		Ridge 8841, S end, E of SW saddle
M-1473	Kae	m eq	10–15	71.09	0.33	15.24	2	0.05	0.53	1.74	4.21	4.3	0.09	151	244	1388	174		Ridge 8841, W side of SW saddle
M-1474	Kae?	f-m eq	5	65.96	0.73	16.11	3.29	0.1	1.3	3.71	4.51	3.68	0.21	112	367	1180	206		Ridge 8841, high on S summit ridge
M-1477A	Kae	f eq	10	64.95	0.73	16.49	4.29	0.1	1.47	3.7	4.09	3.59	0.19	109	405	1306	219		Ridge 8841, N nose, high
M-1478	Kae	m eq	15	62.68	0.8	17.68	4.41	0.09	1.57	4.22	4.22	3.7	0.25	128	573	1896	271		Peak 7970, just N of shear zone
M-1480	Kae	m eq	15	62.79	0.71	17.23	4.69	0.08	2.09	4.71	4.09	3	0.21	112	583	1219	208		N of Peak 7970; 250 m N of shear zone.
M-1525	Kae	m-c. eq	15	70.9	0.34	14.89	2.31	0.1	0.42	1.76	4.25	4.56	0.1	156	216	1274	186		Outlier S of N Fork Parker Creek
M-1526	Kae	m-c. eq	10	70.47	0.36	15.29	2.17	0.08	0.61	1.82	4.25	4.45	0.11	164	256	1358	182		E-facing wall, head of N Fork Parker Creek
M-1527A	Kae	m-c. eq	10	71.91	0.32	14.81	1.77	0.06	0.46	1.61	4.1	4.48	0.09	140	223	1395	174		W of summit, Ridge 8841 (includes felsic pod)
M-1528	Kae	m-c. eq	10	71.74	0.32	14.73	1.91	0.05	0.46	1.71	3.82	4.78	0.09	141	255	1314	174		N nose, high, Ridge 8841
M-835	Trlv	m porph	5–7	74.2429	0.130865	14.2909	1.40277	0.0594888	0.287946	2.0999	3.22922	3.81442	0.0416073	130	282	1199	96		Deadman cirque, SE wall
M-1015	Trlv	m porph	5	73.1082	0.17	14.0391	2.0825	0.069791	0.430717	1.86039	3.32957	4.44089	0.0696914	156	276	1977	138		South end of Silver Lake
M-1030	Trlv	m eq	5	75.7731	0.107701	13.0221	1.31488	0.047848	0.210005	0.888808	3.3246	4.87689	0.0340613	166	155	1442	101		Deadman cirque, N wall
M-1307	Trlv	m eq	5	74.5228	0.15589	13.4824	1.69074	0.0743114	0.379336	1.57907	3.51843	4.13943	0.0576272	154	179	1198	90		Till hill, S bank Parker Creek
M-1311B	Trlv	f eq	1	76.16	0.11	12.91	1.16	0.04	0.15	1.4	3.08	4.56	0.03	171	130	576	94		South tip Grant Lake, LB roadcut
M-1360	Trlv	f eq	<5	75.4452	0.217897	12.7837	1.4744	0.0250217	0.218836	0.78933	2.99478	5.60705	0.043788	148	147	952	194		Ridge 8841, SE base 8200 ft
M-1383	Trlv	m. eq	5	74.4994	0.16931	13.5121	1.35209	0.025298	0.244582	1.05308	3.2989	5.39936	0.0458267	141	167	652	89		Ridge 8841, window at road just N of
M-1385	Trlv	f-m eq	5	75.704	0.183705	13.1025	1.19727	0.0389109	0.297726	1.32704	3.37054	4.28594	0.0923221	173	239	834	76		Ridge 8841, N nose, low elevation
M-1388	Trlv	f-m sh eq	1	74.1588	0.286803	13.3748	1.46494	0.0799492	0.356824	0.954115	3.43099	5.42641	0.0664002	139	154	1534	257		Ridge 8841, NE face 7840 ft
M-1465	Trlv	m eq	1–2	75.52	0.14	13.13	1.47	0.04	0.32	1.26	3.87	3.8	0.05	102	127	769	91		Type loc., Tioga Road switchback
M-1475	Trlv	f eq	1	74.58	0.14	13.68	1.37	0.02	0.11	0.88	3.47	5.32	0.03	149	151	1408	138		Ridge 8841, high on S summit ridge, next to M-1474
M-1476	Trlv?	m eq	5–7	72.92	0.31	14.18	1.85	0.05	0.47	1.4	3.96	4.28	0.09	148	197	1060	180		Ridge 8841, summit
M-1529	Trlv			75.49	0.2	13.19	1.07	0.03	0.21	0.88	3.77	4.71	0.05	151	115	846	117		Ridge 8841, E side of N nose, med elevation
M-1531	Trlv	f eq	1–2	74.52	0.18	13.5	1.42	0.03	0.26	1.51	2.89	5.24	0.05	207	196	1271	134		Reversed Peak, SW of summit, high
M-1532	Trlv	f eq	1	74.18	0.23	13.88	1.28	0.09	0.41	3.52	0.48	5.47	0.05	179	97	579	154		Reversed Peak, SW ridge
M-987	Kjl	m porph	10	73.3769	0.221202	14.2498	1.20501	0.0199606	0.396052	1.65245	3.21334	5.19562	0.0697056	224	272	973	106		Peak 8508 top (Deer Pk)
M-989	Kjl	m porph	10	71.8349	0.3877	14.0743	2.42815	0.0435631	0.832558	2.27069	3.33534	4.2864	0.106463	206	294	782	175		Scarp S of Oh Ridge
M-1016	Kjl	m. porph	10	69.9986	0.426734	14.9252	2.54	0.0404174	0.895782	2.37726	3.6541	4.60787	0.11825	226	323	975	204		Northshore Drive roadcut
M-1031	Kjl	m porph	8–10	72.6975	0.20906	14.8871	1.2985	0.0422798	0.373036	2.54446	3.46114	4.02017	0.0666918	136	296	2015	155		White Wing Mtn, S toe
M-1310	Kjl	m-c porph	10	69.641	0.464074	15.0832	2.63656	0.0472324	0.970224	2.52539	3.78829	4.31909	0.124888	198	339	907	199		Reversed Peak, west face talus
M-1418	Kjl	m-c. porph	10	69.4	0.48	15	2.95	0.06	0.93	2.35	3.67	4.63	0.14	218	335	1008	218		Reversed Pk, NW toe; SE shore Grant L.
M-1479	Kjl	m sh porph	10	69.5	0.44	15.21	2.76	0.04	0.91	2.36	3.49	4.76	0.12	233	324	1092	198		Peak 7970, S edge of shear zone
M-1530	Kjl	m porph	8–10	68.98	0.48	15.34	2.83	0.05	0.95	2.49	3.73	4.62	0.13	204	330	1024	229		Reversed Peak, S of summit, high
Note: Kae, Aeolian Buttes pluton; Trlv, Lee Vining Canyon pluton; Kjl, June Lake pluton.
Textures of granitic rocks: fine-grained (f); medium-grained (m); coarse-grained (c); equigranular (eq); porphyritic (porph); sheared (sh).
Ten major elements in weight percent, normalized to volatile-free total of 99.6% (leaving 0.4% for trace oxides and halogens). Four trace elements in parts per million. Determinations by x-ray fluorescence spectrometry at Hamilton Analytical Laboratory in Clinton, New York, supervised by Richard Conrey.
